# Supplementary material
Source: PubMed Central journal article supplement (PMC10964166)
Supplement: NIHMS1965797-supplement-Supplemental_Table_2.pdf [file NIHMS1965797-supplement-Supplemental_Table_2.pdf]

# Supplemental Information

**SUPPLEMENTAL TABLE 2** Food and Beverage Categories and Associated Subcategories and the USDA WWEIA Food Categorization Codes

| Categories                            | Subcategories                                                                                                                    | USDA WWEIA Food Codes                                    |
|---------------------------------------|----------------------------------------------------------------------------------------------------------------------------------|----------------------------------------------------------|
| Beverages or other liquids            |                                                                                                                                  |                                                          |
| Breast milk                           | —                                                                                                                                | 9602                                                     |
| Formula                               | Ready-to-feed, prepared, and prepared from concentrate                                                                           | 9402, 9404, and 9406                                     |
| Whole milk                            | Whole milk                                                                                                                       | 1002                                                     |
| Reduced-, low-, or nonfat milk        | Reduced-fat, low-fat, or nonfat milk                                                                                             | 1004, 1006, and 1008                                     |
| Flavored milk or milk substitutes     | Flavored milk (whole, reduced-fat, low-fat, or nonfat)                                                                           | 1202, 1204, 1206, and 1208                               |
|                                       | Milk substitutes, milkshakes, and other dairy drinks                                                                             | 1404 and 1402                                            |
| Total milk                            | Whole, reduced-fat, low-fat, nonfat, flavored milk, and/or milk substitutes                                                      | 1002, 1004, 1008, 1202, 1204, 1206, 1208, 1404, and 1402 |
| Water                                 | Tap water, plain water, baby water                                                                                               | 7702, 7704, and 9204                                     |
| 100% juice                            | Citrus juice, apple juice, other fruit juice, vegetable juice, baby juice                                                        | 7002, 7004, 7006, 7008, and 9202                         |
| Sugar-sweetened beverages             | Sweetened beverages (soft drinks, fruit drinks, sports and energy drinks, nutritional beverages, and smoothies and grain drinks) | 7202, 7204, 7206, 7208, and 7220                         |
|                                       | Flavored or enhanced water                                                                                                       | 7802 and 7804                                            |
| Food categories                       |                                                                                                                                  |                                                          |
| Fruit                                 | Apples                                                                                                                           | 6002                                                     |
|                                       | Bananas                                                                                                                          | 6004                                                     |
|                                       | Grapes                                                                                                                           | 6006                                                     |
|                                       | Peaches and nectarines                                                                                                           | 6008                                                     |
|                                       | Berries                                                                                                                          | 6010                                                     |
|                                       | Citrus fruits                                                                                                                    | 6012                                                     |
|                                       | Melons                                                                                                                           | 6014                                                     |
|                                       | Dried fruits                                                                                                                     | 6016                                                     |
|                                       | Other fruits and fruit salads                                                                                                    | 6018                                                     |
|                                       | Baby food (fruit)                                                                                                                | 9004                                                     |
| Vegetables (excluding white potatoes) | Tomatoes, carrots, other red and orange vegetables, and pasta sauces                                                             | 6402, 6404, 6406, and 8410                               |
|                                       | Dark-green and leafy vegetables, lettuce, and lettuce salads                                                                     | 6408 and 6410                                            |
|                                       | Legumes (beans and peas)                                                                                                         | 2802                                                     |
|                                       | Vegetables (string beans, onions, mixed vegetables, and vegetable mixed dishes)                                                  | 6412, 6414, 6420, and 6422                               |
|                                       | Starchy vegetables except potatoes (corn and other starchy vegetables)                                                           | 6416 and 6418                                            |
|                                       | Baby food (vegetables)                                                                                                           | 9006                                                     |
| Vegetables (white potatoes)           | White potatoes (baked or boiled, French fries and other fried white potatoes, mashed and white potato mixtures)                  | 6802, 6804, and 6806                                     |
| Protein foods                         | Meats                                                                                                                            | 2002, 2004, 2006, 2008, and 2010                         |
|                                       | Poultry                                                                                                                          | 2202, 2204, and 2206                                     |
|                                       | Seafood                                                                                                                          | 2402 and 2404                                            |
|                                       | Eggs and omelets                                                                                                                 | 2502                                                     |
|                                       | Cured meats and/or poultry                                                                                                       | 2602, 2604, 2606, and 2608                               |
|                                       | Nuts, seeds, and processed soy products                                                                                          | 2804 and 2806                                            |
|                                       | Cheese and yogurt (includes baby food yogurt)                                                                                    | 1602, 1604, 1802, 1804, 1820, 1822, and 9010             |
| Dairy                                 | Total milk (whole, reduced-fat, low-fat, nonfat, flavored milk, and/or milk substitutes)                                         | 1002, 1004, 1008, 1202, 1204, 1206, 1208, 1404, and 1402 |
|                                       | Cheese and yogurt (includes baby food yogurt)                                                                                    | 1602, 1604, 1802, 1804, 1820, 1822, and 9010             |
| Grains                                | Baby food (cereals)                                                                                                              | 9002                                                     |
|                                       | Ready-to-eat cereals                                                                                                             | 4602 and 4604                                            |
|                                       | Cooked cereal                                                                                                                    | 4802 and 4804                                            |
|                                       | Breads, rolls, and tortillas                                                                                                     | 4202, 4204, 4206, and 4208                               |
|                                       | Quick breads and bread products                                                                                                  | 4402 and 4404                                            |
|                                       | Cooked grains                                                                                                                    | 4002 and 4004                                            |
| Mixed dishes                          | Mixed dishes (meat, poultry, and seafood)                                                                                        | 3002, 3004, 3006, 3404, 9008                             |
|                                       | Mixed dishes (rice, pasta, and other grain-based mixed dishes)                                                                   | 3202, 3204, 3206, 3208, 3402, 3406, and 3506             |
|                                       | Mixed dishes (pizza)                                                                                                             | 3602                                                     |
|                                       | Mixed dishes (burgers and sandwiches [includes tacos and burritos])                                                              | 3702, 3703, 3704, 3706, 3708, and 3502                   |
|                                       | Mixed dishes (soup)                                                                                                              | 3802                                                     |
| Snacks                                | Savory snacks                                                                                                                    | 5002, 5004, 5006, 5008, and 3504                         |
|                                       | Crackers                                                                                                                         | 5202 and 5204                                            |
|                                       | Snack and/or meal bars                                                                                                           | 5402 and 5404                                            |

**SUPPLEMENTAL TABLE 2** Continued

| Categories | Subcategories         | USDA WWEIA Food Codes            |
|------------|-----------------------|----------------------------------|
| Sweets     | Sweet bakery products | 5502, 5504, and 5506             |
|            | Candies and sugar     | 5702, 5704, 8802, 8804, and 8806 |
|            | Other desserts        | 5802, 5804, and 5806             |

—, not applicable.

**SUPPLEMENTAL TABLE 3** Percentage of US Children Who Were 12 to 23 Months of Age and Consuming Different Food Categories by WIC Status (NHANES 2011–2014)

|                                       | Eligible for but Not Receiving<br>( <i>n</i> = 84), % (95% CI) | WIC ( <i>n</i> = 202), % (95% CI) | Not Eligible ( <i>n</i> = 132), % (95% CI) |
|---------------------------------------|----------------------------------------------------------------|-----------------------------------|--------------------------------------------|
| Fruits                                | 57.6 (41.7–72.0) <sup>a</sup>                                  | 70.6 (63.9–76.4) <sup>a</sup>     | 86.4 (78.5–91.7)                           |
| Vegetables (excluding white potatoes) | 42.3 (30.5–55.0) <sup>a,b</sup>                                | 60.4 (52.2–68.0)                  | 58.1 (46.6–68.7)                           |
| Vegetables (including white potatoes) | 24.4 (16.4–34.6)                                               | 26.5 (20.6–33.4)                  | 20.9 (13.3–31.3)                           |
| Protein foods                         | — <sup>c</sup>                                                 | 80.5 (74.5–85.3) <sup>a</sup>     | 90.0 (80.0–95.3)                           |
| Dairy                                 | 94.9 (85.0–98.4)                                               | 91.7 (85.9–95.2) <sup>a</sup>     | 97.2 (92.3–99.0)                           |
| Grains                                | 76.5 (66.6–84.2) <sup>a,b</sup>                                | 85.5 (76.2–91.5)                  | 87.2 (76.3–93.5)                           |
| Mixed dishes                          | 75.2 (61.4–85.3)                                               | 74.8 (68.0–80.6)                  | 68.7 (54.1–80.4)                           |
| Snacks                                | 45.9 (32.0–60.5) <sup>a</sup>                                  | 48.5 (39.2–57.9) <sup>a</sup>     | 69.1 (57.4–78.8)                           |
| Sweets                                | 68.1 (53.9–79.6)                                               | 64.0 (56.7–70.6)                  | 70.7 (59.7–79.8)                           |

Age is presented in months at the time of examination in an MEC. Foods contained in the fruit category include apples, bananas, grapes, peaches and nectarines, berries, citrus fruits, melons, dried fruits, other fruits and fruit salad, and baby food fruit. Foods contained in the vegetables (excluding white potatoes) category include tomatoes, carrots, other red and orange vegetables, dark-green and leafy vegetables, lettuce and lettuce salads, legumes, string beans, onions, mixed vegetables, vegetable mixed dishes, corn, other starchy vegetables, and baby food vegetables. Foods contained in the vegetables (including white potatoes) category include baked or boiled potatoes, French fries and other fried white potatoes, and mashed and white potato mixture. Foods contained in the protein foods category include meats, poultry, seafood, eggs and omelets, cured meats and poultry, nuts, seeds, processed soy products, baby food yogurt, cheese, and yogurt. Foods contained in the grains category include baby food cereals, ready-to-eat cereals, cooked cereals, breads, rolls, tortillas, quick breads and bread products, and cooked grains. Foods contained in the mixed-dishes category include meat, poultry, and seafood mixed dishes; rice, pasta, and other grain-based mixed dishes; pizza mixed dishes; burgers and sandwiches; and soups mixed dishes. Foods contained in the snacks category include savory snacks, crackers, and snack and/or meal bars. Foods contained in the sweets category include sweet bakery products, candy and sugar, and other desserts. WIC status is defined as children who are currently receiving WIC benefits. Eligible for but not receiving WIC benefits is defined as children who are eligible for WIC benefits on the basis of family income/poverty ratio, receipt of Medicaid, or receipt of SNAP benefits (previously called food stamps). Not eligible is defined as children who do not meet WIC eligibility criteria. —, not applicable.

<sup>a</sup> Indicates results that are significantly different from those of children who are not eligible for WIC benefits (*t* test; *P* < .05).

<sup>b</sup> Indicates results that are significantly different from those of WIC participants (*t* test; *P* < .05).

<sup>c</sup> Indicates that the estimate did not meet the National Center for Health Statistics criteria for data presentation. Although degrees of freedom and the relative CI were in compliance with data-presentation standards, the absolute CI was slightly >0.3.
